# Supplementary material
Source: MDPI journal article supplement (https://www.mdpi.com/2227-9040/10/11/481)
Supplement: s1 [file s1 › chemosensors-1983809-supplementary.pdf]

# Porphyrin Hetero-Trimer Involving a Hydrophilic and a Hydrophobic Structure with Application in the Fluorescent Detection of Toluidine Blue

Anca Lascu <sup>1,\*</sup>, Camelia Epuran <sup>1</sup>, Ion Fratilescu <sup>1</sup>, Mihaela Birdeanu <sup>2</sup>, Liliana Halip <sup>1</sup> and Eugenia Fagadar-Cosma <sup>1,\*</sup>

<sup>1</sup> Institute of Chemistry "Coriolan Dragulescu", Mihai Viteazu Ave. 24, 300223 Timisoara, Romania

<sup>2</sup> National Institute for Research and Development in Electrochemistry and Condensed Matter, Plautius Andronescu Street 1, 300224 Timisoara, Romania

\* Correspondence: alascu@acad-icht.tm.edu.ro (A.L.); efagadar@yahoo.com (E.F.-C.)

**Table S1.** Porphyrins used for the formation of homo- and hetero-dimers and trimers with or without linkers and their applications.

| Porphyrin dimers                                                                                                                                                                                                                                                                                                                                           | Linker                             | Application                                           | Results                                                                                      | Ref. |
|------------------------------------------------------------------------------------------------------------------------------------------------------------------------------------------------------------------------------------------------------------------------------------------------------------------------------------------------------------|------------------------------------|-------------------------------------------------------|----------------------------------------------------------------------------------------------|------|
| 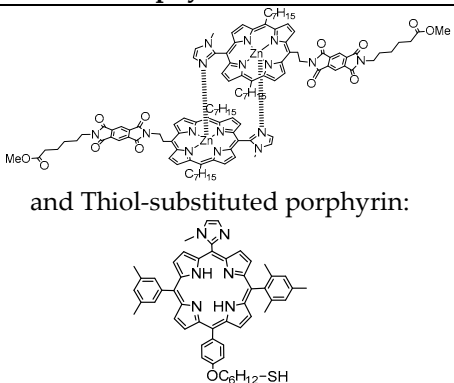 <p>and Thiol-substituted porphyrin:</p> 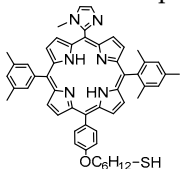                                                                                                                                            | No; self-assembling on a substrate | Photocurrent generation                               | Self-assembling provides larger photocurrent values than pre-organized structures            | [1]  |
| 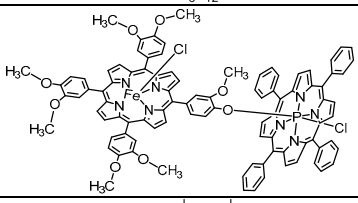                                                                                                                                                                                                                                                                        | No                                 | Fluorescent detection of hydrogen peroxide from water | Accurate in concentration range 40–90 μM                                                     | [4]  |
| 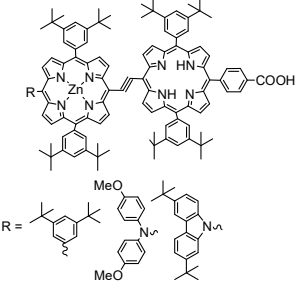 <p>R = 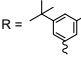 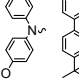 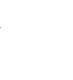</p> | Ethynyl bridge                     | Investigation regarding photovoltaic performances     | Stronger electron-donating abilities do not improve the short-circuit photocurrent densities | [2]  |

|                                                                  |                                                                 |                                                                                          |                                                                                              |            |
|------------------------------------------------------------------|-----------------------------------------------------------------|------------------------------------------------------------------------------------------|----------------------------------------------------------------------------------------------|------------|
|                                                                  | <p>-Single bond<br/>-Ethyne, or<br/>- Di-ethyne<br/>bridges</p> | <p>Photosensitizers for PDT</p>                                                          | <p>Porphyrin dimer connected by diethyne link is more efficient singlet oxygen generator</p> | <p>[3]</p> |
|                                                                  | <p>Diethynyl bridge</p>                                         | <p>-PDT treatment<br/>-In MRI as contrast agent</p>                                      | <p>-Induce medium-size contrast;<br/>-Is easily internalized in cancer cells</p>             | <p>[5]</p> |
| <p>R=Gd-1,4,7,10-tetraazacyclododecane-1,4,7,10-tetraacetate</p> |                                                                 |                                                                                          |                                                                                              |            |
|                                                                  | <p>Diethynyl bridge</p>                                         | <p>Improving perovskite solar cells</p>                                                  | <p>-Power conversion efficiency of 19.44%</p>                                                | <p>[6]</p> |
|                                                                  | <p>Diethyne bridge</p>                                          | <p>Measurement of viscosity</p>                                                          | <p>Viscosity range of 0 – 10<sup>3</sup> cP, even at elevated temperatures of 90 °C</p>      | <p>[7]</p> |
| <p>R = CH<sub>3</sub></p>                                        | <p><i>meta</i>-dimethyl-aryl bridges</p>                        | <p>Formation of inclusion complexes with Lindqvist-type polyoxometalate (POM) anions</p> | <p>Fluorescence quenching due to the formation of inclusion complexes</p>                    | <p>[8]</p> |

| 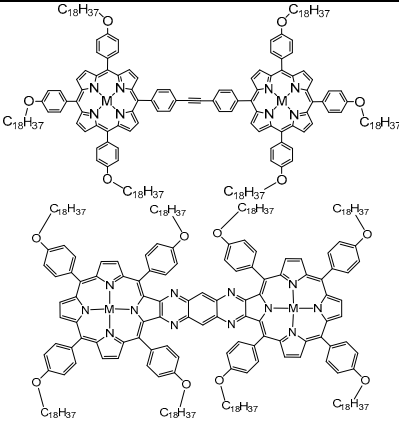 <p>M = Mn(II)- and/or Cu(II)</p>                                      | <p>-Flexible alkyne linker;<br/>-Rigid conjugated spacer</p> | <p>Investigation of the self-assembling properties at a solid-liquid interface</p>        | <p>The Cu-containing porphyrin dimer self-assembled into more stable monolayers, regardless of the type of linker</p>                                                                                             | [9]  |
|---------------------------------------------------------------------------------------------------------------------------------------------------------|--------------------------------------------------------------|-------------------------------------------------------------------------------------------|-------------------------------------------------------------------------------------------------------------------------------------------------------------------------------------------------------------------|------|
| 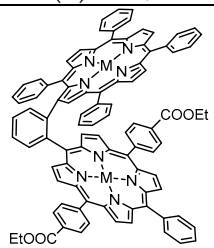 <p>Where M = Mn(III), Fe(III), Ni(II), Cu(II), Zn(II), and Pd(II)</p> | <p>Benzene ring spacer</p>                                   | <p>Investigation of the relationships between crystalline structure and UV-Vis allure</p> | <p>Straightforward new synthesis route for both homo- and heterobimetallic porphyrin dimers;<br/>Metal-metal distances differ with the type of ligand and are correlated with Soret band shifts and splitting</p> | [10] |
| Porphyrin trimers                                                                                                                                       | Linker                                                       | Application                                                                               | Results                                                                                                                                                                                                           | Ref. |
| 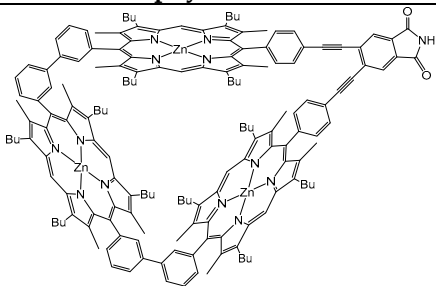                                                                     | <p>Biphenyl bridges</p>                                      | <p>Receptor for fullerene</p>                                                             | <p>Cyclic porphyrin able to chelate fullerene guest</p>                                                                                                                                                           | [11] |
| 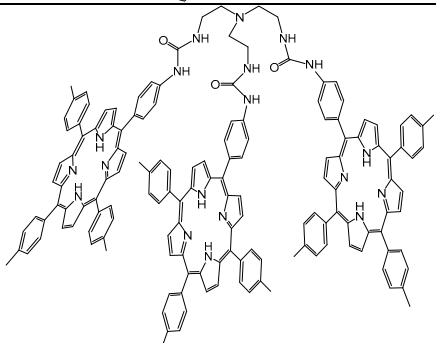                                                                     | <p>Tripodal tris-urea backbone</p>                           | <p>Receptor for fullerene</p>                                                             | <p>Stable inclusion complexes with fullerene in solution</p>                                                                                                                                                      | [12] |

|                                                                                     |                                             |                                                |                                                            |      |
|-------------------------------------------------------------------------------------|---------------------------------------------|------------------------------------------------|------------------------------------------------------------|------|
| 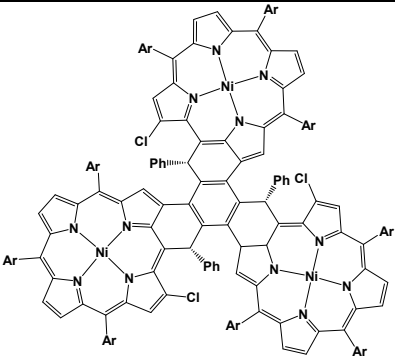   | Fused by<br>1,3,5-<br>tribenzylben-<br>zene | molecule-<br>based<br>chiroptical<br>materials | Amplified circular dichroism<br>response                   | [13] |
| 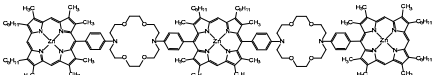   | Piperazine                                  | Chelating<br>agents for<br>metal ions          | New synthesis route,<br>optimized geometry<br>calculations | [14] |
| 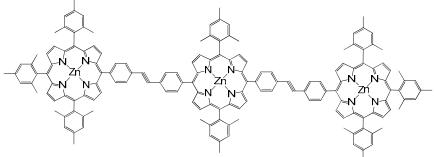   | Diarylethynyl<br>bridges                    | -                                              | “Click” synthesis route,<br>complete characterization      | [15] |
| 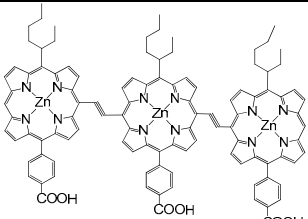  | Ethynyl<br>bridges                          | Dye-sensitized<br>Solar Cells                  | Successful anchoring to TiO <sub>2</sub><br>surface        | [16] |
| 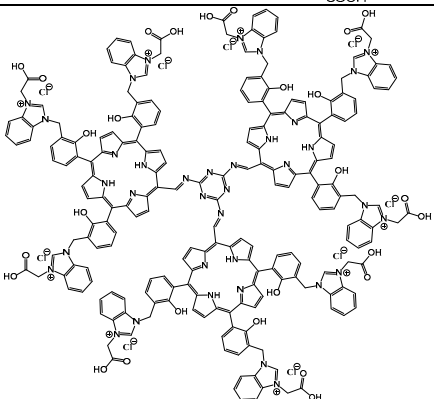 | Triazole<br>linker                          | Dye-sensitized<br>solar cells                  | Simple, stable, additive-free,<br>energy generating device | [17] |

*UV-Vis, fluorescence and FT-IR spectra for TSPP:*

The UV-Vis spectrum of bare TSPP, realized in ethanol (EtOH) in order to limit the possibility of protonation and aggregation of TSPP is presented in Figure S1. The *ethio* shape and the location of all bands are perfectly fitted with those reported in literature data [18].

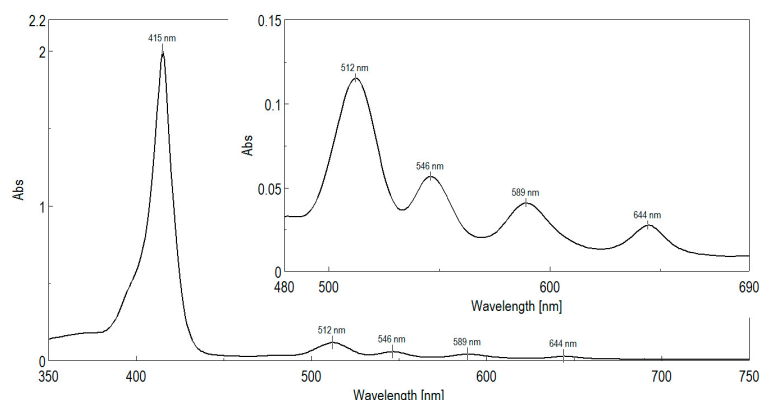

**Figure S1.** UV-Vis spectrum of 5,10,15,20-tetrakis(4-sulfonatophenyl)-porphyrin (TSPP) in ethanol ( $c = 6.4377 \times 10^{-6}$  M).

In case of using water as solvent, the protonation of the sulfonated groups is evident; it produces the splitting of the Soret band into two bands, one located at 413 nm and the other one at 433 nm, even at a pH level of 4.9 due to starting of self-association phenomena when both H- and J-type aggregates are formed (Figure S2-black spectrum). When the pH is lowered to 1.4, the complete inner protonation of the porphyrin is observed: only the Soret band at 433 nm is present, along with the appearance of a supplementary band at 488 nm caused by enhanced J-type aggregation [19,20]. The hyperchromic effect of both the Soret and the QI band, located at 645.5 nm is also noticed (Figure S2-red spectrum).

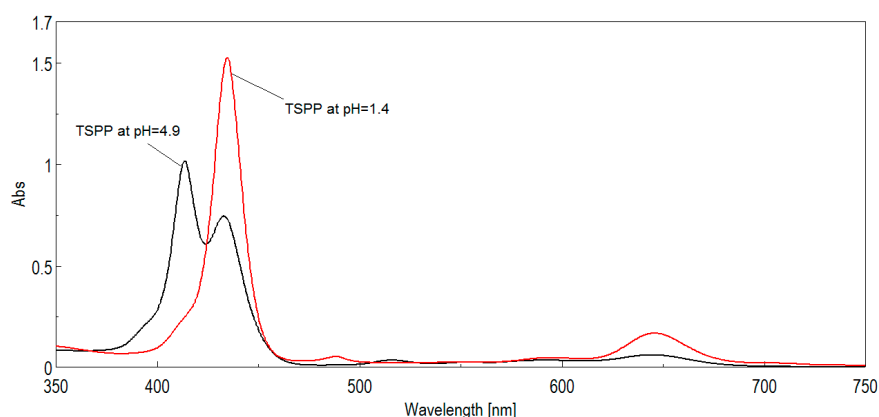

**Figure S2.** UV-Vis spectra for TSPP ( $c = 8 \times 10^{-6}$  M) at initial pH=4.9 and at acid pH=1.4, for the same concentration.

Fluorescence spectra for TSPP were performed at  $\lambda_{\text{exc}} = 435$  nm, slit width = 10 nm for excitation and 5 nm for emission without additional filter at a scan rate of 100 nm/min. The two emission spectra of TSPP were registered at different pH values, 4.9 and 2.7 respectively (Figure S3). The shape of the two spectra is similar, emphasizing higher differences in intensity of emission. Our results are in agreement with the reported data [21].

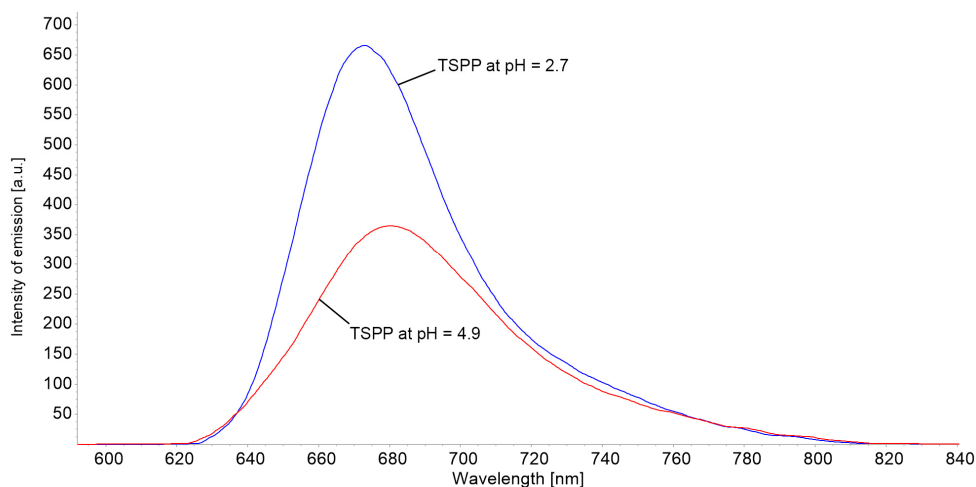

**Figure S3.** The emission spectra of TSPP at different pH values.

All the characteristic FT-IR bands of the protonated TSPP porphyrin (Figure S4) are in accordance to literature data [18,22,24,25].

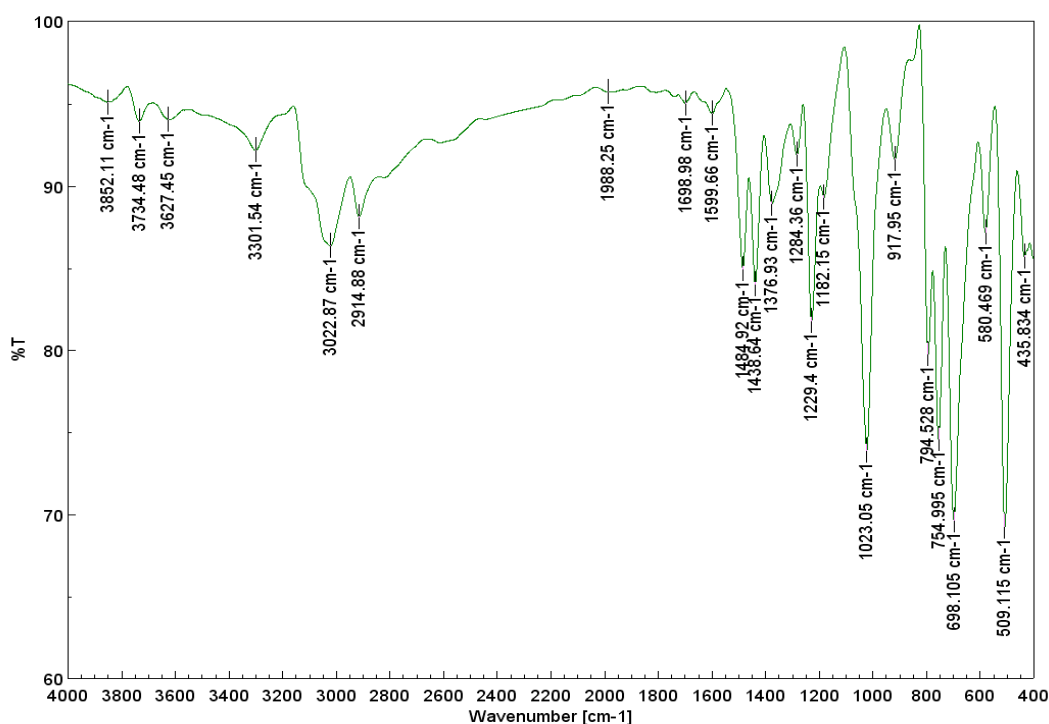

**Figure S4.** FT-IR spectrum of 5,10,15,20-tetrakis(4-sulfonatophenyl)-porphyrin (TSPP).

The bending vibrations of the C-C bonds of the aromatic ring  $698\text{ cm}^{-1}$  [23]. The symmetric and asymmetric stretching vibrations of  $\text{SO}_2$  are identified in the ranges  $1182\text{--}1229\text{ cm}^{-1}$  and  $1438\text{--}1484\text{ cm}^{-1}$  respectively [24]. The band at  $1023\text{ cm}^{-1}$  is assigned as S-O stretching vibration [22]. The bands observed at  $3022\text{ cm}^{-1}$  in the IR spectrum are assigned as the  $\nu\text{C-H}$  modes of the phenyl ring [25].

Regarding the formation of the hetero-trimer, isosbestic points are clearly illustrated (Figure S5), at  $414\text{ nm}$  and  $416\text{ nm}$  on the Soret band and at  $498\text{ nm}$  and  $516\text{ nm}$  on the Q bands. These prove that

multiple absorbing species are generated during the process of obtaining the hetero-trimer. In addition a new Q band appears at 547 nm that can be associated with the generation of Pt-allyloxyPP-TSPP- hetero-trimer and the new location of Q(0-1) band absorption.

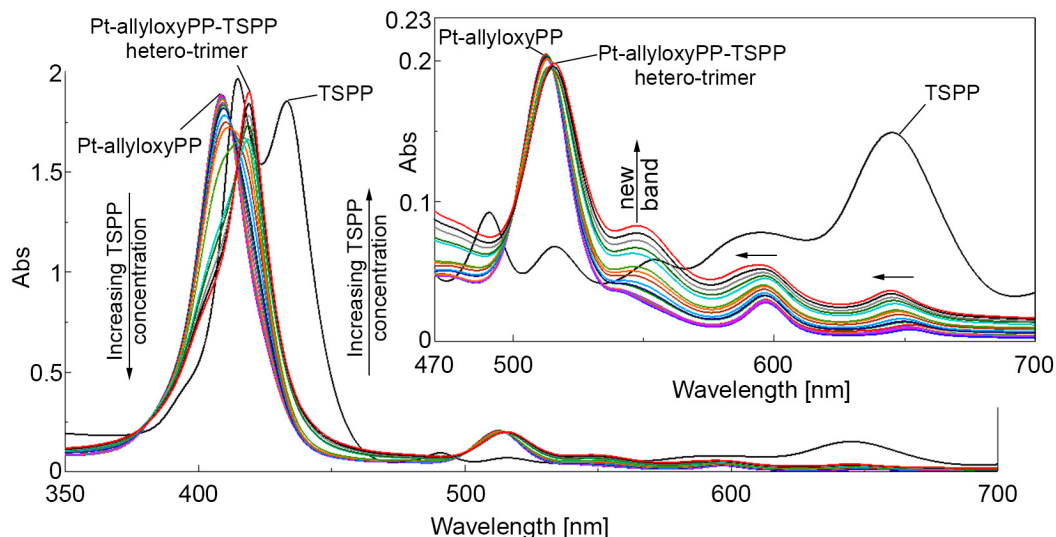

**Figure S5.** Overlapped UV-Vis spectra during the formation of the hetero-trimer. In detail the Q bands.

Regarding the  $^1\text{H}$ -NMR spectrum of the Pt-allyloxyPP-TSPP hetero-trimer, the integrals for the equivalent protons are in fair correspondence with the proposed Pt-allyloxyPP-TSPP hetero-trimer structure that is in detail described in the main text (Figure S6).

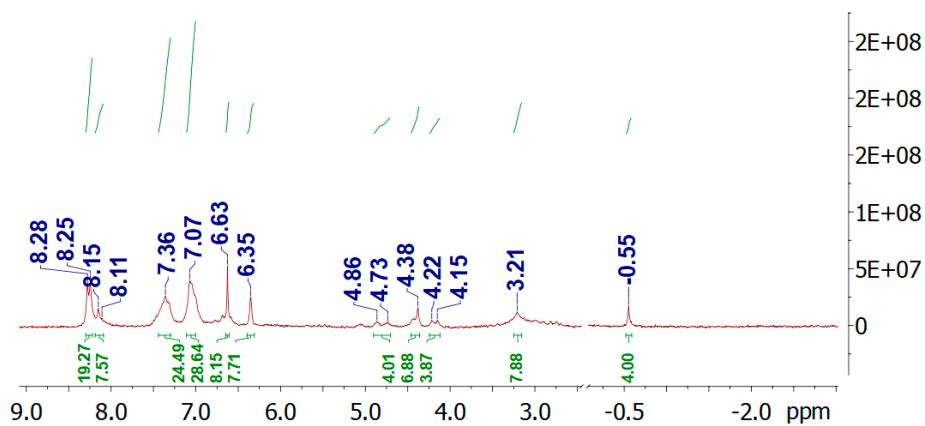

**Figure S6.**  $^1\text{H}$ -NMR spectrum of the Pt-allyloxyPP-TSPP hetero-trimer.

The emission spectra illustrating the effect of the main interference species toward the TB detection are presented in Figure S7.

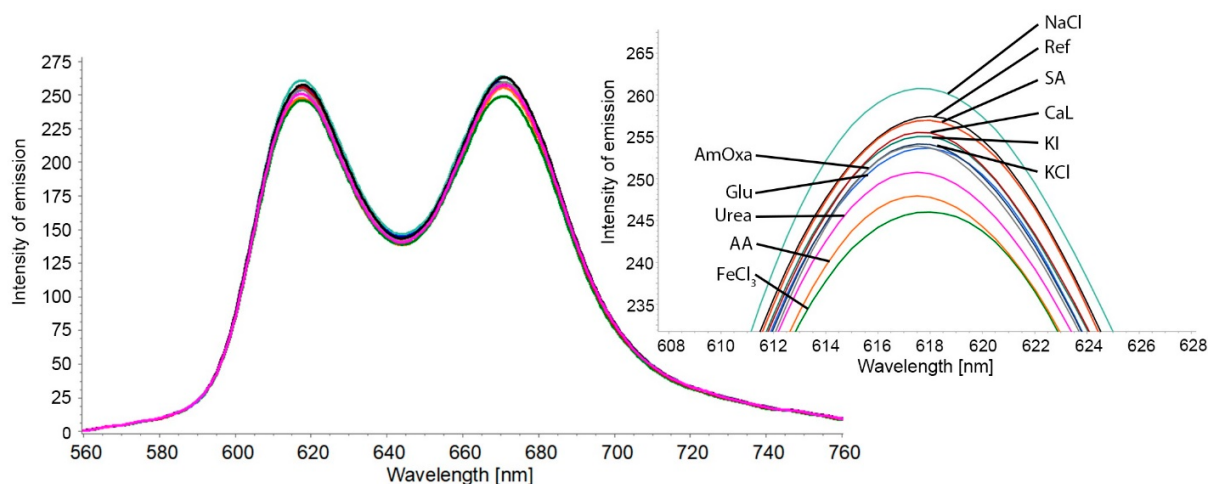

**Figure S7.** Overlapped emission spectra for interfering species that are exceeding 100 times the concentration of the main analyte (toluidine blue, represented as Ref curve).

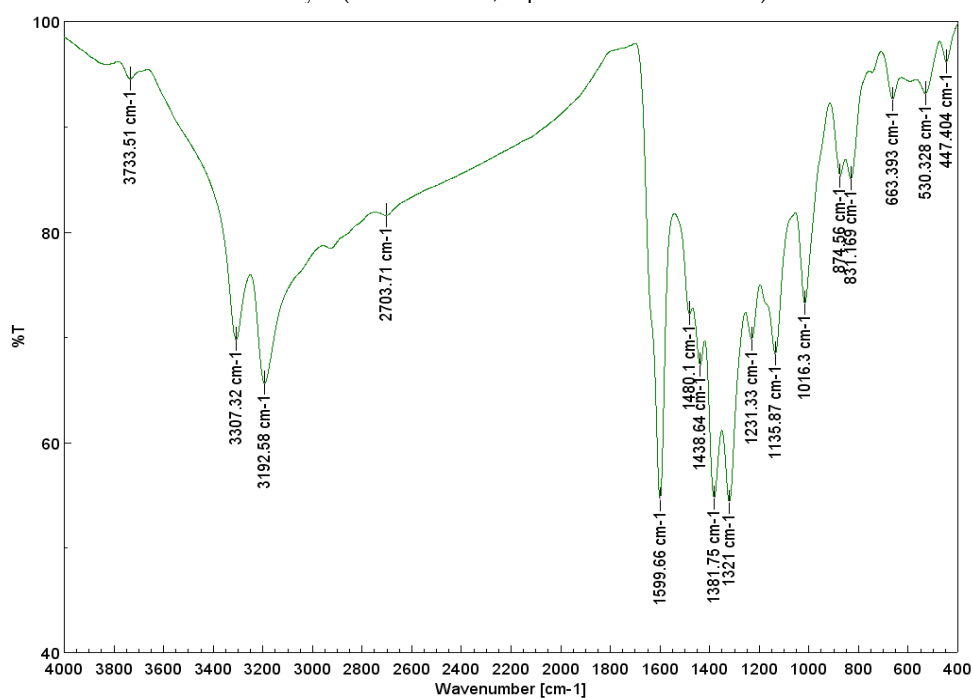

**Figure S8.** FT-IR spectrum of toluidine blue.

## References

1. Nomoto, A.; Mitsuoka, H.; Ozeki, H.; Kobuke, Y. Porphyrin hetero-dimer as charge separating system for photocurrent generation. *Chem. Commun.* **2003**, 9, 1074–1075. <https://doi.org/10.1039/b300456b>.
2. Liu, Y.; Lin, H.; Li, J.; Dy, J.T.; Tamaki, K.; Nakazaki, J.; Nakayama, D.; Nishiyama, C.; Uchida, S.; Kubo, T.; Segawa, H. Ethynyl-linked push–pull porphyrin hetero-dimers for near-IR dye-sensitized solar cells: photovoltaic performances versus excited-state dynamics. *Phys. Chem. Chem. Phys.* **2012**, 14, 16703. <https://doi.org/10.1039/c2cp43165c>.
3. Mazur, L.M.; Roland, T.J.; Leroy-Lhez, S.; Sol, V.; Samoc, M.; Samuel, I.D.W.; Matczyszyn, K. Efficient Singlet Oxygen Photogeneration by Zinc Porphyrin-Dimers Upon One- and Two-Photon Excitation. *J. Phys. Chem. B* **2019**, 123, 4271–4277. <https://doi.org/10.1021/acs.jpcc.8b12561>.

4. Fagadar-Cosma, E.; Badea, V.; Fagadar-Cosma, G.; Palade, A.; Lascu, A.; Fringu, I.; Birdeanu, M. Trace oxygen sensitive material based on two porphyrin derivatives heterodimer complex. *Molecules* **2017**, *22*, 1787–1789. <https://doi.org/10.3390/molecules22101787>.
5. Schmitt, J.; Jenni, S.; Sour, A.; Heitz, V.; Bolze, F.; Pallier, A.; Bonnet, C.; Toth, E.; Ventura, V. A Porphyrin Dimer–GdDOTA Conjugate as a Theranostic Agent for One- and Two-Photon Photodynamic Therapy and MRI. *Am. Chem. Soc.* **2018**, *29*, 3726–3738. <https://doi.org/10.1021/acs.bioconjchem.8b00634>.
6. Chiang, Y.H.; Chou, H.H.; Cheng, W.T.; Li, Y.R.; Yeh, C.Y.; Chen, P. Porphyrin dimers as hole-transporting layers for high-efficiency and stable perovskite solar cells. *ACS Energy Lett.* **2018**, *3*, 1620–1626. <https://doi.org/10.1021/acsenenergylett.8b00607>.
7. Vysniauskas, A.; Ding, D.; Qurashi, M.; Boczarow, I.; Balaz, M.; Anderson, H.; Kuimova, M. Tuning the sensitivity of fluorescent porphyrin dimers to viscosity and temperature. *Chem.-Eur. J.* **2017**, *23*, 11001–11010. <https://doi.org/10.1002/chem.201700740>.
8. Lamare, R.; Ruppert, R.; Elhabiri, M.; Ulrich, G.; Ruhlmann, L.; Weiss, J. Design and synthesis of charged porphyrin dimers for polyoxometalate recognition. *C. R. Chim.* **2021**, *24*, 115–126. <https://comptes-rendus.academie-sciences.fr/chimie/articles/10.5802/crchim.105/>.
9. Habets, T.; Lensen, D.; Speller, S.; Elemans, J.A. Self-assembly of covalently linked porphyrin dimers at the solid–liquid interface. *Molecules* **2019**, *24*, 3018. <https://doi.org/10.3390/molecules24163018>.
10. Schissler, C.; Schneider, E.K.; Felker, B.; Weis, P.; Nieger, M.; Kappes, M.M.; Bräse, S. A Synthetic Strategy for Cofacial Porphyrin-Based Homo- and Heterobimetallic Complexes. *Chem.-Eur. J.* **2021**, *27*, 3047–3054. <https://doi.org/10.1002/chem.202002394>.
11. Gil-Ramírez, G.; Karlen, S.D.; Shundo, A.; Porfyrakis, K.; Ito, Y.; Briggs, G.A.D.; Morton, J. J. L.; Anderson, H.L. A Cyclic Porphyrin Trimer as a Receptor for Fullerenes. *Org. Lett.* **2010**, *12*, 3544–3547. <https://doi.org/10.1021/ol101393h>.
12. Fang, X.; Zhou, Y.-Z.; Zheng, J.-Y. Clawlike Tripodal Porphyrin Trimer: Ion-Controlled On–Off Fullerene Binding. *J. Org. Chem.* **2014**, *79*, 1184–1191. <https://doi.org/10.1021/jo4026176>.
13. Kato, K.; Osuka, A. Propeller-shaped Semi-fused Porphyrin Trimers: Molecular symmetry-dependent Chiroptical Response. *Chem. Eur. J.* **2020**, *26*, 10217–10221. <https://doi.org/10.1002/chem.202002157>.
14. Tyurin, V.S.; Mikhailitsyna E.A.; Semeikin, A.S.; Beletskaya I.P. Synthesis of New Porphyrin Trimers via Buchwald-Hartwig Amination Reaction. *Macrocyclics* **2015**, *8*, 358–365. <https://doi.org/10.6060/mhc150769b>.
15. Polevaya, Y.P.; Tyurin, V.S.; Beletskaya, I.P. Linear conjuncted porphyrin trimer synthesis via "click" reaction. *J. Porphyrins Phthalocyanines* **2013**, *17*, 1–15. <https://doi.org/10.1142/S1088424613500636>.
16. Hamamura, T.; Nakazaki, J.; Uchida, S.; Kubo, T.; Segawa, H. Controlling the Rotation of Porphyrin Units in Ethynyl-linked Porphyrin Trimers for Dye-sensitized Solar Cells by Anchoring onto TiO<sub>2</sub> Surface. *Chem. Lett.* **2014**, *43*, 796–798. <https://doi.org/10.1246/cl.140087>.
17. Bhuse, D.V.; Bhuse V.M.; Bhagat P.R. Star-type melamine based conjugated carboxy functionalized porphyrin trimer for DSSCs: An efficient approach to clean, aggregation free and true energy generation. *Mater. Chem. Phys.* **2022**, *287*, 126312. <https://doi.org/10.1016/j.matchemphys.2022.126312>.
18. Sobczynski, J.; Tonnesen, H.H.; Kristensen, S. Influence of aqueous media properties on aggregation and solubility of four structurally related meso-porphyrin photosensitizers evaluated by spectrophotometric measurements. *Pharmazie* **2013**, *68*, 100–109. <https://doi.org/10.1691/ph.2013.2130>.
19. Zhao, L.; Liu, M.; Li, A.; An, H.; Ye, H.; Zhang, Y. Aggregation and supramolecular chirality of 5,10,15,20-tetrakis-(4- sulfonatophenyl)-porphyrin on achiral poly(2-(dimethylamino)ethyl methylacrylate)-grafted ethylene-vinyl alcohol membrane. *J. Mater. Chem. C* **2015**, *3*, 3650–3658. <https://doi.org/10.1039/C5TC00037H>.
20. Wurthner F., Keiser, T.E.; Saha-Moller C.R. J-Aggregates: From Serendipitous Discovery to Supramolecular Engineering of Functional Dye Materials. *Angew. Chemie Int. Ed.* **2011**, *50*, 3376–3410. <https://doi.org/10.1002/anie.201002307>.
21. Hanyz, I.; Wrobel D. The influence of pH on charged porphyrins studied by fluorescence and photoacoustic spectroscopy. *Photochem. Photobiol. Sci.* **2002**, *1*, 126–132. <https://doi.org/10.1039/b108837h>.
22. Tsolekile, N.; Ncapayi, V.; Obiyanwa G.K.; Songca, S.; Oluwafemi, O.S. Synthesis of meso-tetra-(4-sulfonatophenyl) porphyrin (TPPS4) – CuInS/ZnS quantum dots conjugate as an improved photosensitizer. *Int. J. Nanomedicine* **2019**, *14*, 7065–7078. <https://doi.org/10.2147/IJN.S211959>.
23. Marcioni, M.; Alongi, J.; Ranucci, E.; Malinconico, M.; Laurienzo, P.; Ferruti, P.; Manfredi A. Semi-Crystalline Hydrophobic Polyamidoamines: A New Family of Technological Materials? *Polymers* **2021**, *13*, 1018. <https://doi.org/10.3390/polym13071018>.

24. Kathiravan, A.; Kumar, P.S.; Renganathan, R.; Anandan, S. Photoinduced electron transfer reactions between meso-tetrakis(4-sulfonatophenyl)porphyrin and colloidal metal-semiconductor nanoparticles *Colloids Surf. A Physicochem. Eng. Asp.* **2009**, *333*, 175–181. <https://doi.org/10.1016/j.colsurfa.2008.09.04>.
25. Anto, P.L.; Anto, R.J.; Varghese, H.T.; Panicker, C.Y.; Philipe, D; Brolo, A.G. FT-IR, FT-Raman and SERS spectra of anilinium sulfate. *J. Raman Spectrosc.* **2009**, *40*, 1810–1815, <https://doi.org/10.1002/jrs.2323>.
